# Supplementary material for: HDAC Screening Identifies the HDAC Class I Inhibitor Romidepsin as a Promising Epigenetic Drug for Biliary Tract Cancer
Source: MDPI journal article supplement (doi:10.3390/cancers13153862), 2021-07-31
Supplement: s1 [file s1]

Supplementary Files

# HDAC Screening Identifies the HDAC Class I Inhibitor Romidepsin as a Promising Epigenetic Drug for Biliary Tract Cancer

Christian Mayr, Tobias Kiesslich, Sara Erber, Dino Bekric, Heidemarie Dobias, Marlena Beyreis, Markus Ritter, Tarkan Jäger, Bettina Neumayer, Paul Winkelmann, Eckhard Klieser, Daniel Neureiter

| Gene Name  | Forward Primer (5'-3') | Reverse Primer (5'-3') |
|------------|------------------------|------------------------|
| HDAC1      | GGATACGGAGATCCCTAATG   | CGTGTTCTGGTTAGTCATATTG |
| HDAC2      | GGTCATGCTAAATGTGTAGAAG | GTCTGGTCCAAAATACTCAAAG |
| HDAC3      | AAAACCTGAAGATGCTGAAC   | CCTGCTATAGTTCTCCTCAG   |
| HDAC4      | AAAAGAGACCAGATGAGGAG   | AGACAGACAGACAAGAGAAC   |
| HDAC5      | AGAATGGATTTGCCATCATC   | TGGCTACAGAGTTGAAGAAG   |
| HDAC6      | AAAAGGAAGAGCTGATGTTG   | GATGCAGATAAACTGAGTCG   |
| HDAC7      | CTTTCAGGATAGTCGTGATG   | ATTTGGCAGAAACATGGTAG   |
| HDAC8      | CAGCATAGGTCCTGATTATG   | TCCCTTTGATGTAGTTGAGG   |
| HDAC9      | AAAGAGAGAATTTACCTGG    | GAAAGCAGTTTGTTCATGTG   |
| HDAC10     | GATATCACATTGGTTCTGCC   | ATCCCATCTAAGAGGTACAG   |
| HDAC11     | TAATGAGCTCAAGAGGAAGG   | TCAAACAGAACTTGATGGC    |
| beta-actin | GACGACATGGAGAAAATCTG   | ATGATCTGGGTCATCTTCTC   |

**Figure S1.** Primer sequences used for evaluation of HDAC expression in biliary tract cancer cells (all purchased at Merck; KiCqStart® SYBR® Green Primers).

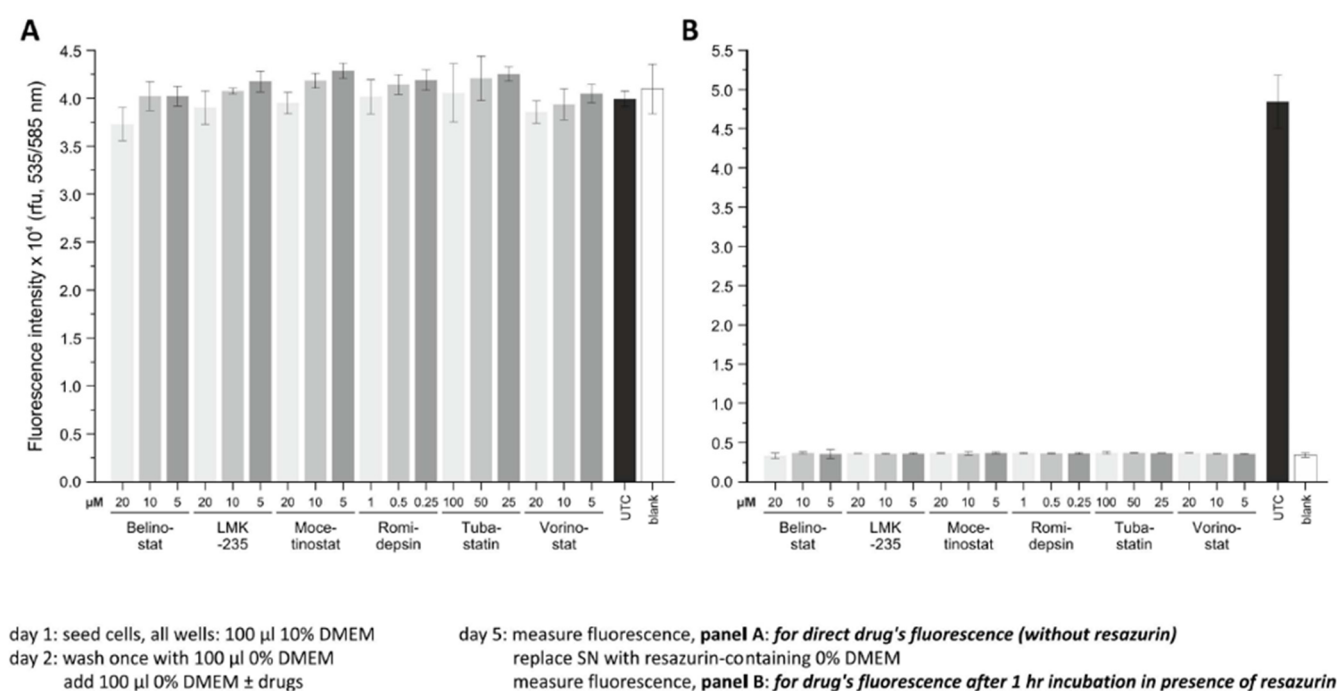

**Figure S2.** Analysis of autofluorescence of HDAC inhibitors after 72 h. **(A)** Measurement of direct drug's fluorescence (without addition of resazurin) of various concentrations (including the highest used concentration) of the used HDAC inhibitors compared to untreated cells (UTC) and blank. **(B)** Fluorescence of HDAC inhibitors compared to untreated cells and blank using the resazurin assay. Data are presented as mean value of  $n \geq 4$  technical replicates  $\pm$  standard deviation.

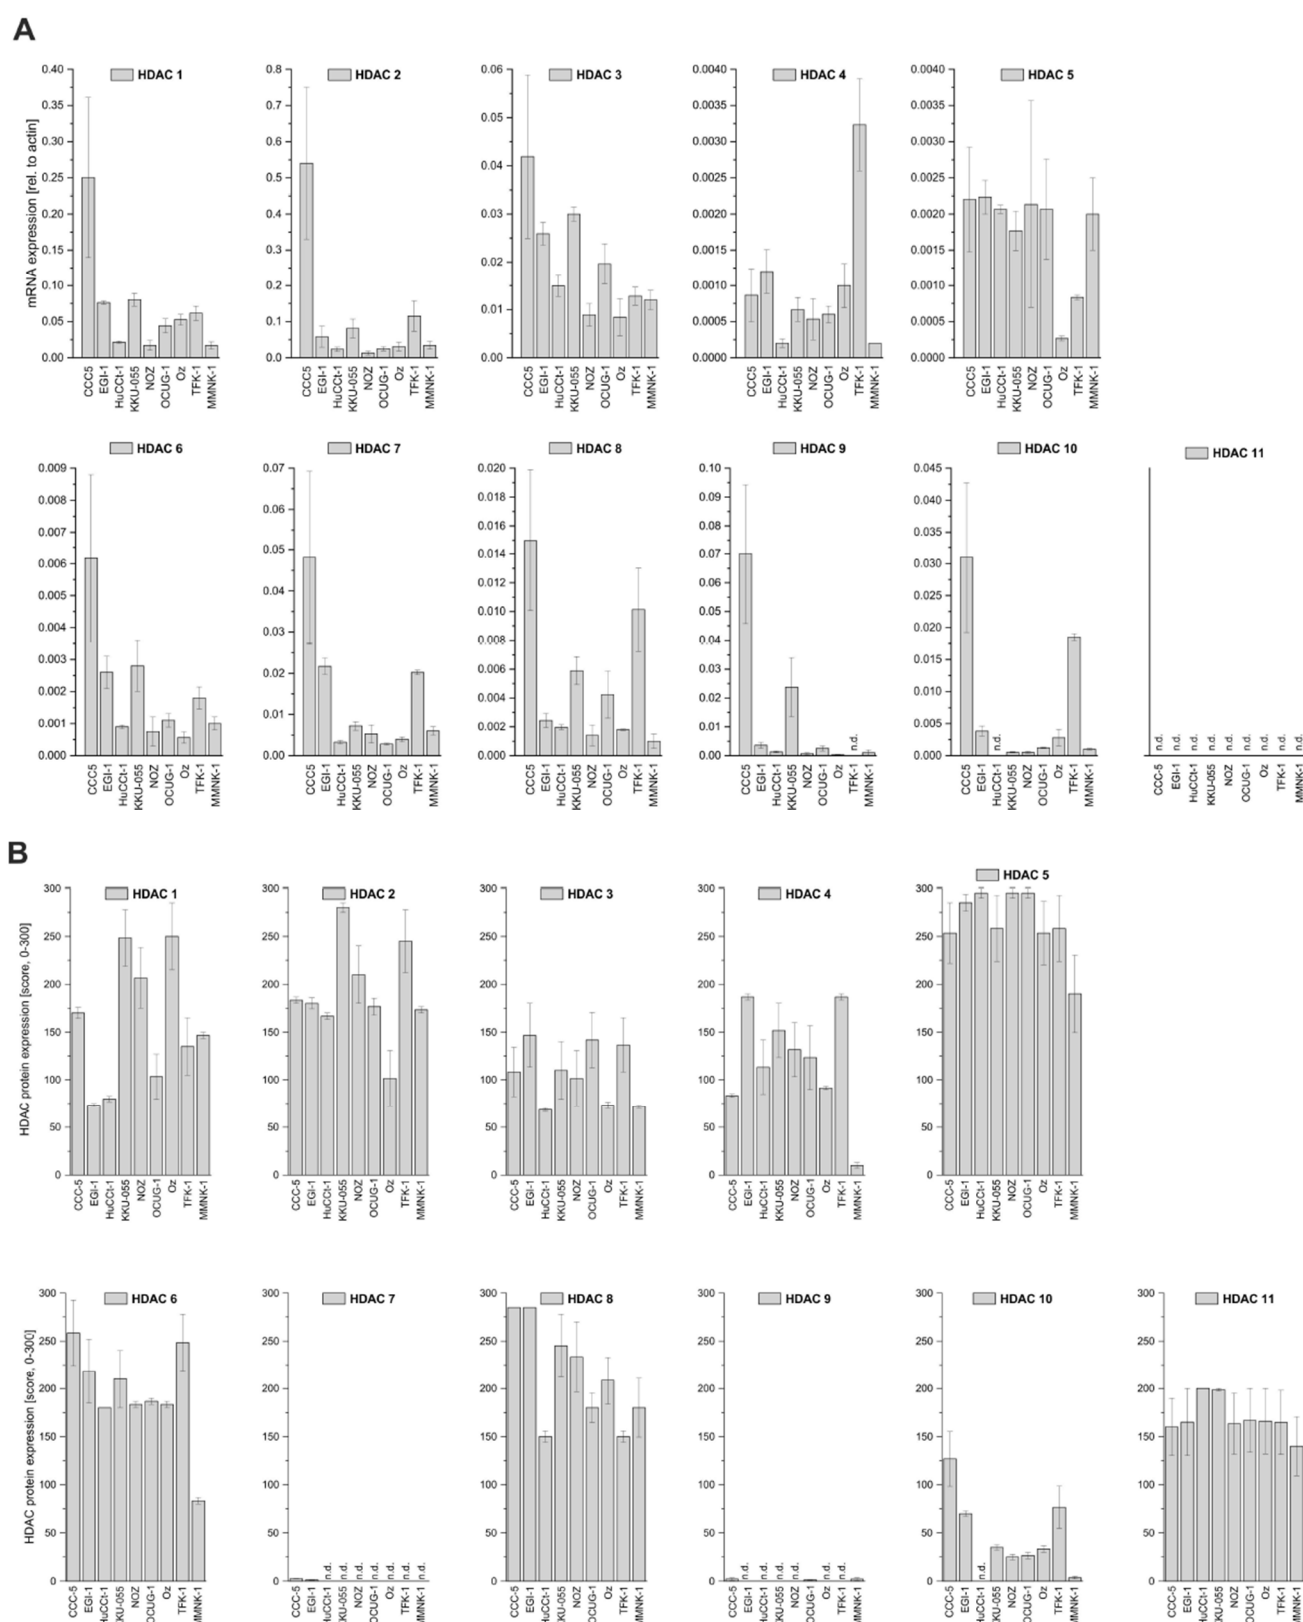

| Belinostat [ $\mu$ M] | 20.00 | 10.00 | 5.00 | 2.50 | 1.25 | 0.63 | 0.31 | 0.16 | 0.08 | 0.04 |
|-----------------------|-------|-------|------|------|------|------|------|------|------|------|
| CCC-5                 | *     | *     |      |      | *    |      |      |      |      |      |
| EGI-1                 | *     | *     |      | *    |      |      |      |      |      | *    |
| HuCCT-1               | *     | *     | *    | *    |      |      |      |      |      | **   |
| KKU-055               | **    | **    | **   | **   |      |      |      |      |      |      |
| NOZ                   | **    | **    | **   | *    |      |      |      |      |      |      |
| OCUG-1                | **    | **    | **   | **   | **   | **   |      |      |      |      |
| OZ                    | **    | **    | **   | **   | **   |      |      |      |      |      |
| TFK-1                 | **    | **    | **   | **   | *    |      | *    |      |      | *    |

| LMK-235 [ $\mu$ M] | 20.00 | 10.00 | 5.00 | 2.50 | 1.25 | 0.63 | 0.31 | 0.16 | 0.08 | 0.04 |
|--------------------|-------|-------|------|------|------|------|------|------|------|------|
| CCC-5              |       |       |      |      |      |      |      |      |      |      |
| EGI-1              | *     | *     | *    | *    |      |      |      |      |      |      |
| HuCCT-1            | *     | *     | *    |      |      |      |      | *    |      |      |
| KKU-055            | **    | **    | **   | **   |      |      |      |      |      |      |
| NOZ                | **    | **    | **   | *    | *    |      |      |      |      |      |
| OCUG-1             | *     | **    | **   | *    |      |      |      |      | **   |      |
| OZ                 | *     | *     | *    |      |      |      |      |      |      |      |
| TFK-1              | *     | *     | *    | **   | **   | **   | *    |      |      |      |

| Mocetinostat [ $\mu$ M] | 20.00 | 10.00 | 5.00 | 2.50 | 1.25 | 0.63 | 0.31 | 0.16 | 0.08 | 0.04 |
|-------------------------|-------|-------|------|------|------|------|------|------|------|------|
| CCC-5                   | *     | *     |      |      |      |      |      |      |      |      |
| EGI-1                   | *     | *     |      |      | **   | **   | **   |      |      |      |
| HuCCT-1                 | *     |       |      |      |      |      |      | *    |      |      |
| KKU-055                 | **    | **    | **   | **   |      |      |      |      |      |      |
| NOZ                     | **    | **    | **   | **   | *    |      |      |      |      |      |
| OCUG-1                  | **    | **    | **   | **   |      |      |      |      |      |      |
| OZ                      |       |       |      |      |      |      |      |      |      |      |
| TFK-1                   | **    | **    | **   | **   | *    |      |      |      |      | *    |

| Romidepsin [ $\mu$ M] | 1.000 | 0.500 | 0.250 | 0.125 | 0.063 | 0.031 | 0.016 | 0.008 | 0.004 | 0.002 |
|-----------------------|-------|-------|-------|-------|-------|-------|-------|-------|-------|-------|
| CCC-5                 |       |       |       |       |       |       |       |       |       |       |
| EGI-1                 | *     | *     | *     | *     | *     |       |       |       |       |       |
| HuCCT-1               | **    | **    | **    | **    | **    | **    | **    | *     |       |       |
| KKU-055               | **    | **    | **    | **    | **    | **    | **    | **    | *     |       |
| NOZ                   | **    | **    | **    | **    | **    | **    | **    | **    | **    | **    |
| OCUG-1                | **    | **    | **    | **    | **    | **    | **    | **    | **    | *     |
| OZ                    | **    | *     | **    | **    | **    | **    | **    | **    | **    |       |

| Romidepsin [nM] | 100.00 | 50.00 | 25.00 | 12.50 | 6.25 | 3.13 | 1.56 | 0.78 | 0.39 | 0.20 |
|-----------------|--------|-------|-------|-------|------|------|------|------|------|------|
| TFK-1           | *      | *     | *     | *     | *    | *    |      |      |      |      |

  

| Tubastatin-A [μM] | 100.00 | 50.00 | 25.00 | 12.50 | 6.25 | 3.13 | 1.56 | 0.78 | 0.39 | 0.20 |
|-------------------|--------|-------|-------|-------|------|------|------|------|------|------|
| CCC-5             | *      |       | *     | *     |      |      |      |      |      |      |
| EGI-1             | **     |       | *     |       |      |      |      |      |      |      |
| HuCCT-1           | **     | **    | **    | *     |      |      |      |      |      | *    |
| KKU-055           | **     | **    | *     |       |      |      |      |      |      |      |
| NOZ               | **     | **    |       |       |      |      |      |      |      |      |
| OCUG-1            | **     | **    |       |       |      |      |      |      |      |      |
| OZ                | **     | **    | **    |       |      |      |      |      |      |      |
| TFK-1             | *      |       |       |       |      |      |      |      |      |      |

  

| Vorinostat [μM] | 20.00 | 10.00 | 5.00 | 2.50 | 1.25 | 0.63 | 0.31 | 0.16 | 0.08 | 0.04 |
|-----------------|-------|-------|------|------|------|------|------|------|------|------|
| CCC-5           |       |       |      |      |      |      |      |      |      |      |
| EGI-1           | *     | *     | *    | *    |      |      |      |      |      |      |
| HuCCT-1         | *     |       |      |      |      |      | *    |      |      |      |
| KKU-055         | **    | **    | *    |      | *    |      |      | *    |      |      |
| NOZ             | **    | **    | *    | *    |      |      |      |      |      |      |
| OCUG-1          | **    | **    | **   | *    |      |      | **   |      |      |      |
| OZ              | *     |       |      |      |      |      |      |      |      |      |
| TFK-1           | **    | *     | **   | *    |      |      |      |      |      |      |

**Figure S4.** Statistics for Figures 2A–F. Significant differences in cell viability between treated and untreated samples were calculated by paired *t*-tests. \* (light green) indicate significant ( $p < 0.05$ ) and \*\* (dark green) indicate highly significant ( $p < 0.01$ ) results, respectively.

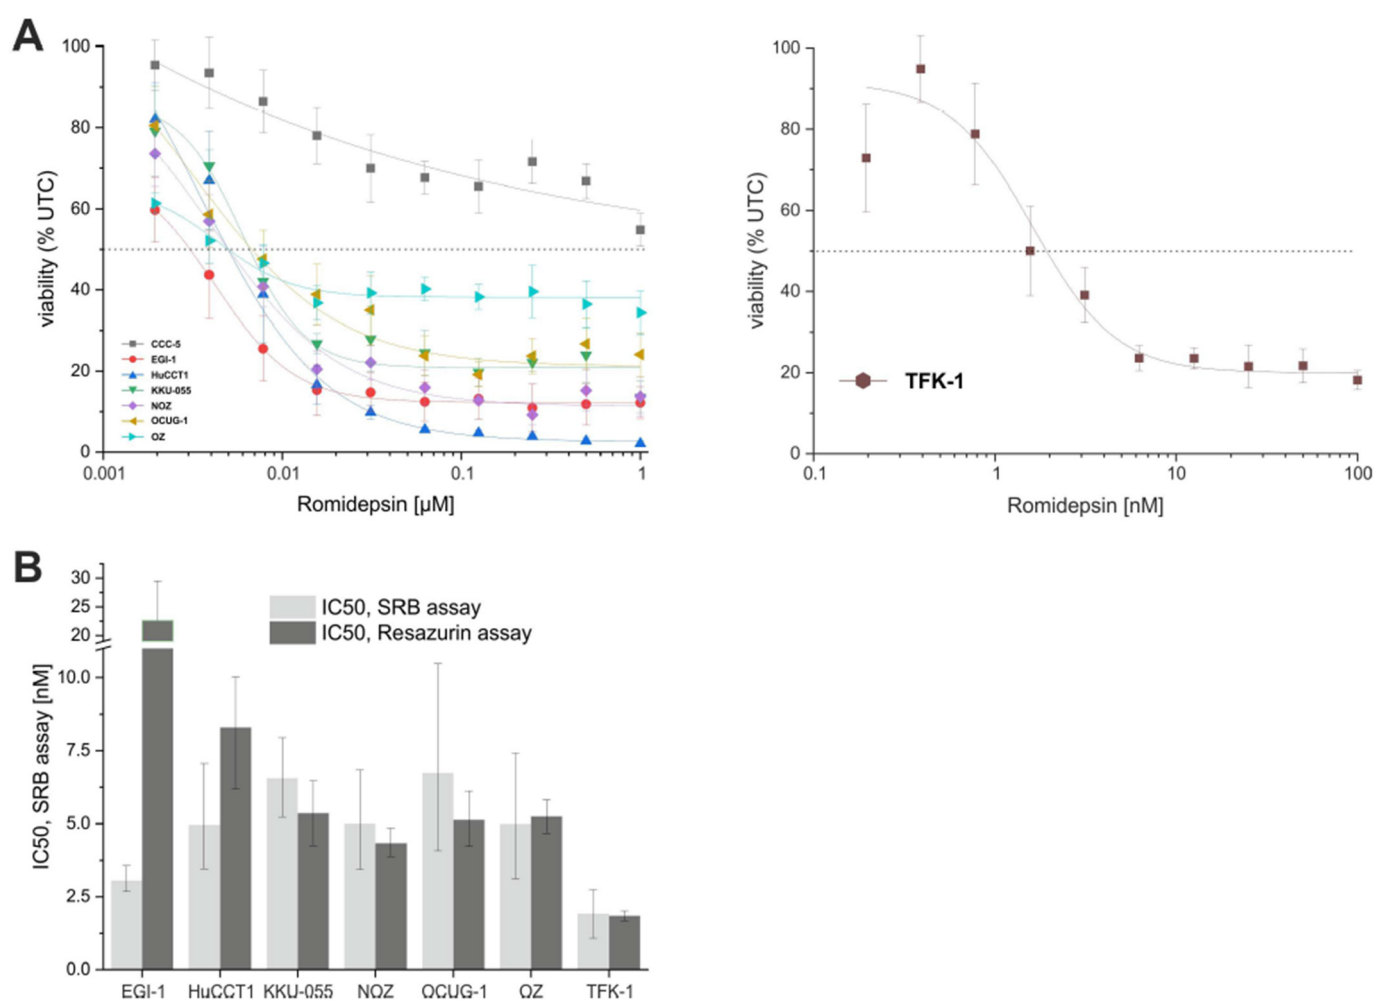

**Figure S5.** Reduction of cell viability of BTC cells by romidepsin using the SRB assay. Cells were seeded as described in the material and methods section. After 72 h of incubation with romidepsin, cells were fixed at 4 °C for 1 hour, washed and incubated with the SRB substrate for 15 min in the dark according to the manufacturer's protocol. After air-drying, samples were incubated with the solubilization solution and absorbance was measured at 565 nm using the Tecan Spark multimode reader. (A) BTC cells were incubated for 72 h with romidepsin. Shown are viability data related to untreated controls (UTC). (B) Comparison of IC<sub>50</sub> values of the tested cell lines based on four parameter logistic regression. Data are presented as mean value  $\pm$  SEM related to untreated control cells of at least three individual biological replicates. Abbreviations: BTC, biliary tract cancer.

| Romidepsin [nM] |      | 100.00 | 50.00 | 25.00 | 12.50 | 6.25 | 3.13 | 1.56 | 0.78 | 0.39 | 0.20 |
|-----------------|------|--------|-------|-------|-------|------|------|------|------|------|------|
| KKU-055         | 2 h  |        |       |       |       |      |      |      |      |      |      |
|                 | 24 h | **     | **    | **    | **    | **   | *    | *    |      |      |      |
|                 | 30 h | *      | *     | *     | *     | *    | *    | *    |      |      |      |
|                 | 48 h | **     | **    | **    | **    | **   |      |      |      |      |      |
| TFK-1           | 2 h  | *      |       |       |       | *    |      | *    |      |      |      |
|                 | 24 h |        |       |       |       |      |      |      |      |      |      |
|                 | 30 h |        |       | *     |       | *    | *    |      |      |      |      |
|                 | 40 h | **     | **    | **    | **    | **   | **   |      |      |      |      |

**Figure S6.** Statistics for Figures 4 A and B. Significant differences in cell viability between treated and untreated samples were calculated by paired *t*-tests. \* (light green) indicate significant ( $p < 0.05$ ) and \*\* (dark green) indicate highly significant ( $p < 0.01$ ) results, respectively.

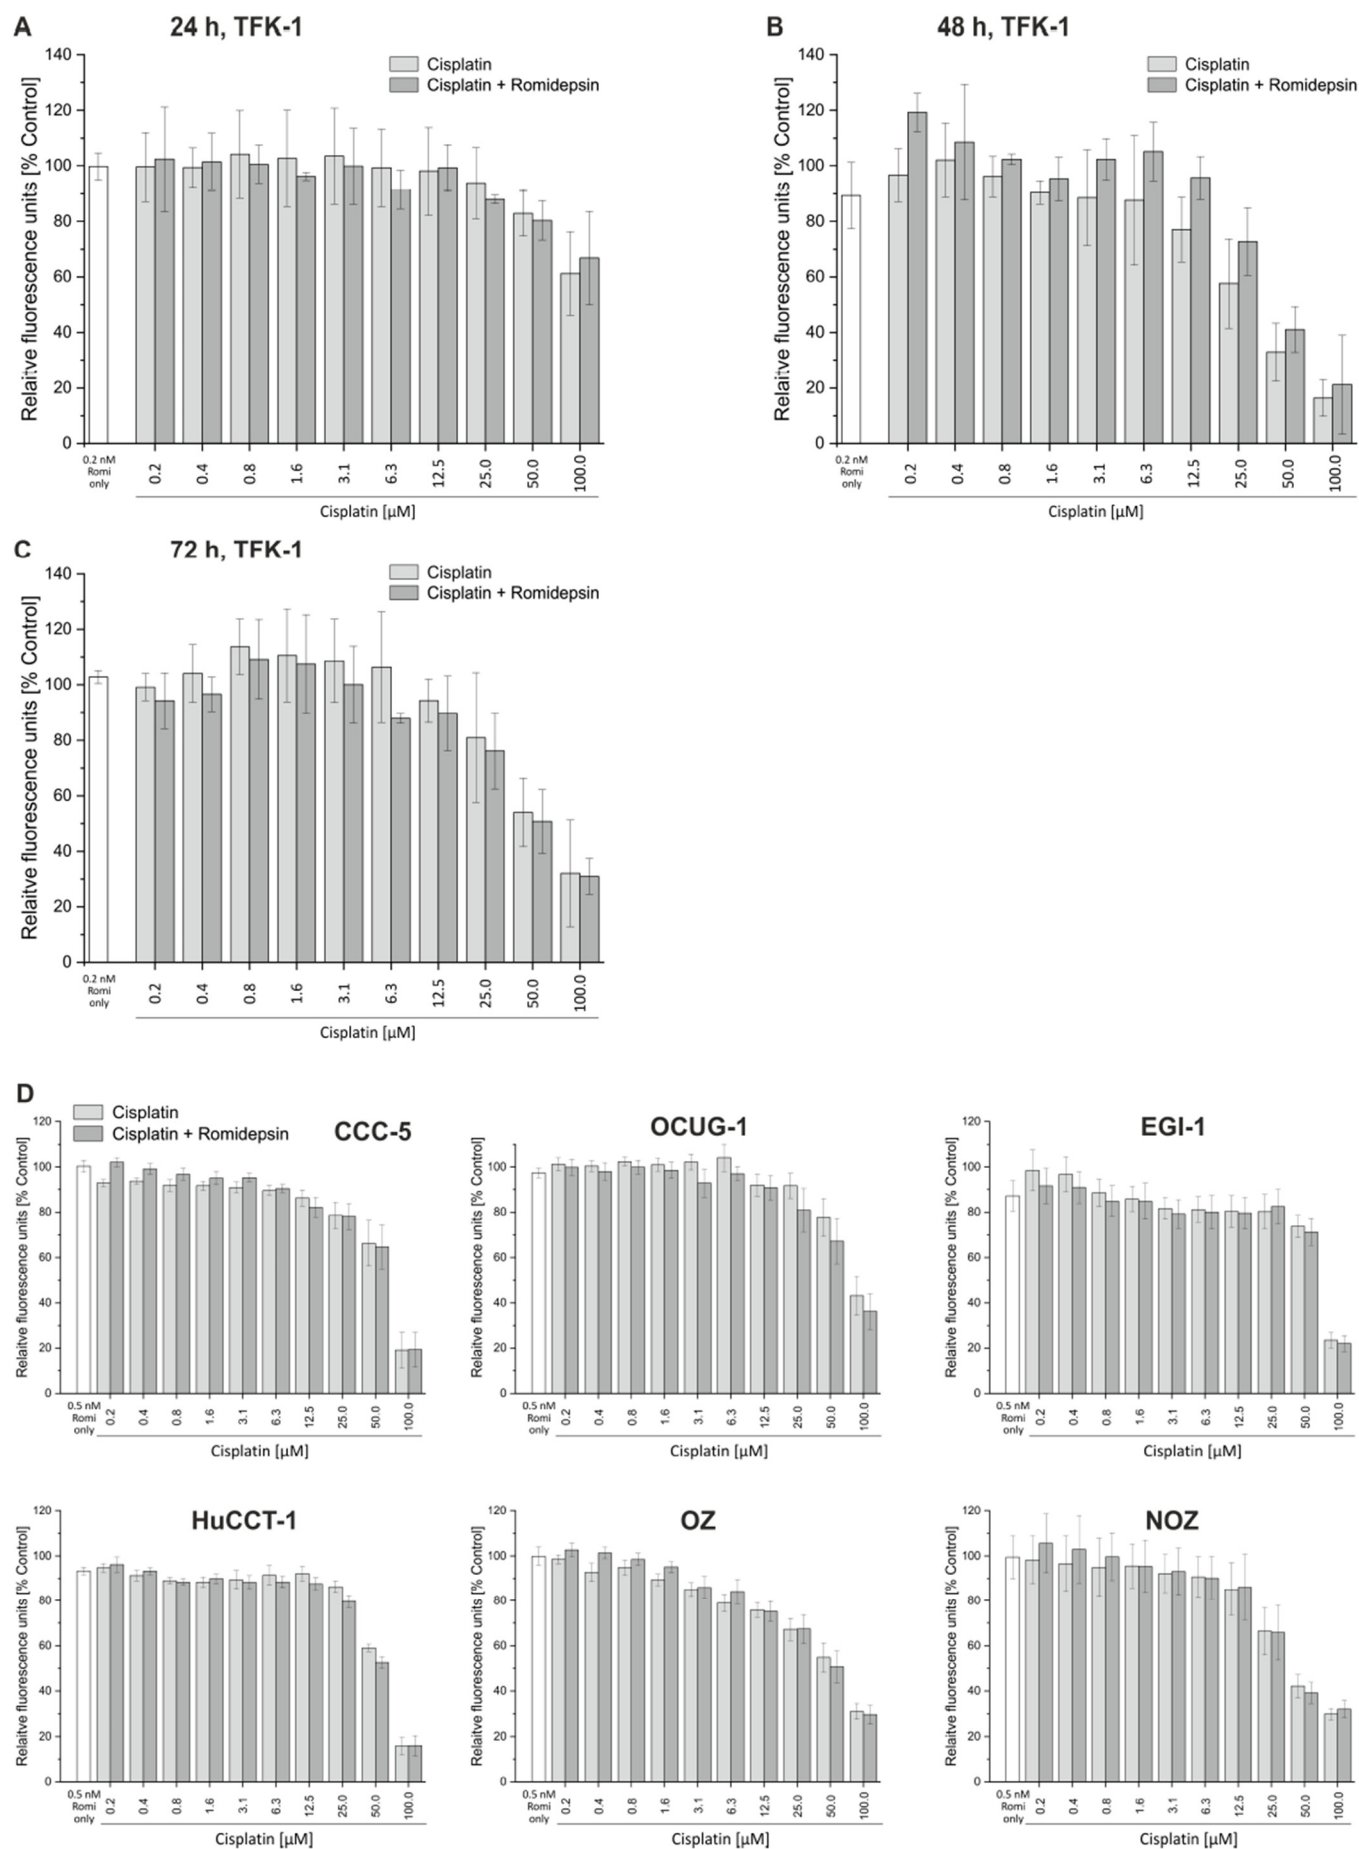

**Figure S7.** Evaluation of combined romidepsin and cisplatin treatment. Simultaneous treatment of romidepsin-sensitive TFK-1 cells with a dilution series of cisplatin and 0.5 nM romidepsin for 24 h (A), 48 h (B) and 72 h (C), respectively. (D) Simultaneous treatment of BTC cells (without KKKU-055 and TFK-1 cells) with romidepsin and cisplatin for 72 h. The left bar (white) represents the cytotoxic effect of 0.5 nM romidepsin as a single treatment. Data are presented as mean value of at least three individual biological replicates. Abbreviations: BTC, biliary tract cancer.

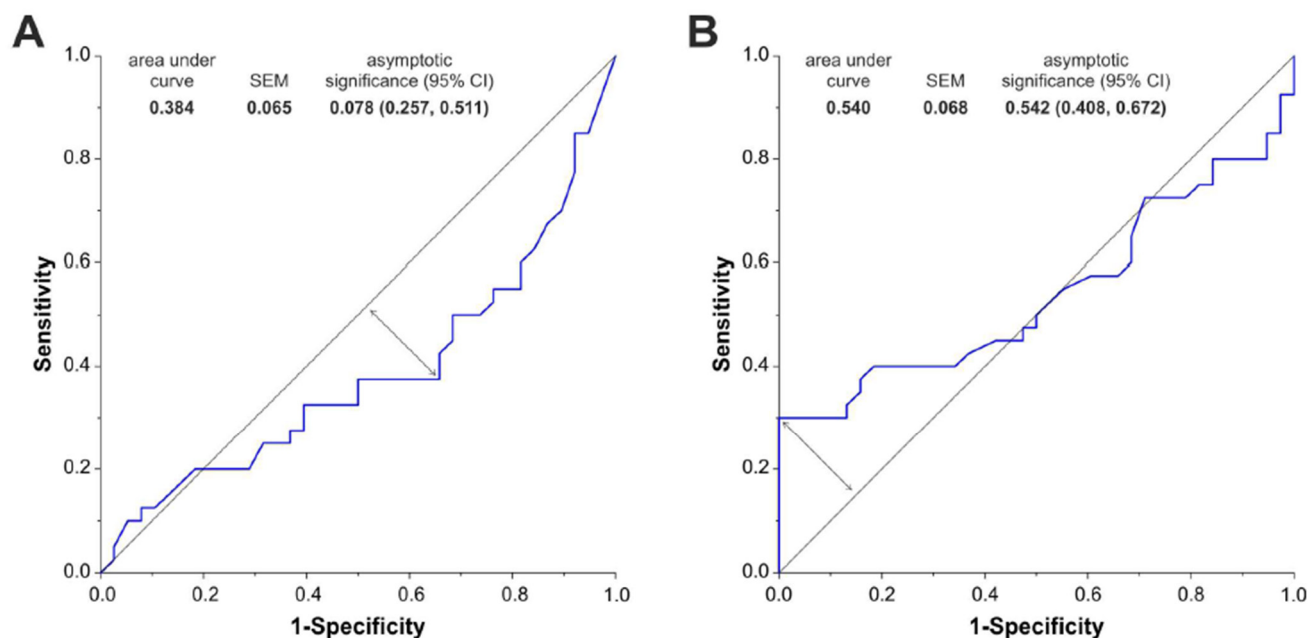



| J     | J      | positive<br>if ≥ | sensitivity | 1 -<br>specificity |
|-------|--------|------------------|-------------|--------------------|
| 0.283 | -0.283 | 70.000           | 0.375       | 0.658              |
| 0.266 | -0.266 | 15.833           | 0.550       | 0.816              |
| 0.258 | -0.258 | 63.333           | 0.400       | 0.658              |
| 0.257 | -0.257 | 77.500           | 0.375       | 0.632              |
| 0.241 | -0.241 | 14.167           | 0.575       | 0.816              |
| 0.239 | -0.239 | 18.333           | 0.550       | 0.789              |
| 0.238 | -0.238 | 27.500           | 0.525       | 0.763              |
| 0.237 | -0.237 | 33.333           | 0.500       | 0.737              |
| 0.234 | -0.234 | 43.333           | 0.450       | 0.684              |
| 0.233 | -0.233 | 54.167           | 0.425       | 0.658              |
| 0.217 | -0.217 | 10.000           | 0.625       | 0.842              |
| 0.216 | -0.216 | 12.500           | 0.600       | 0.816              |
| 0.213 | -0.213 | 22.500           | 0.550       | 0.763              |
| 0.204 | -0.204 | 80.833           | 0.375       | 0.579              |
| 0.195 | -0.195 | 5.833            | 0.700       | 0.895              |
| 0.193 | -0.193 | 7.500            | 0.675       | 0.868              |
| 0.184 | -0.184 | 38.333           | 0.500       | 0.684              |
| 0.178 | -0.178 | 82.500           | 0.375       | 0.553              |
| 0.175 | -0.175 | 123.333          | 0.325       | 0.500              |
| 0.151 | -0.151 | 92.500           | 0.375       | 0.526              |
| 0.150 | -0.150 | 113.333          | 0.350       | 0.500              |
| 0.146 | -0.146 | 4.167            | 0.775       | 0.921              |
| 0.125 | -0.125 | 104.167          | 0.375       | 0.500              |
| 0.120 | -0.120 | 151.667          | 0.275       | 0.395              |
| 0.118 | -0.118 | 157.500          | 0.250       | 0.368              |
| 0.097 | -0.097 | 0.833            | 0.850       | 0.947              |
| 0.096 | -0.096 | 2.667            | 0.825       | 0.921              |
| 0.096 | -0.096 | 133.333          | 0.325       | 0.421              |
| 0.095 | -0.095 | 146.667          | 0.300       | 0.395              |
| 0.093 | -0.093 | 154.167          | 0.275       | 0.368              |
| 0.092 | -0.092 | 163.333          | 0.250       | 0.342              |
| 0.089 | -0.089 | 173.333          | 0.200       | 0.289              |
| 0.071 | -0.071 | 1.833            | 0.850       | 0.921              |
| 0.070 | -0.070 | 141.667          | 0.325       | 0.395              |
| 0.066 | -0.066 | 168.333          | 0.250       | 0.316              |
| 0.047 | 0.047  | 213.333          | 0.100       | 0.053              |
| 0.046 | 0.046  | 204.167          | 0.125       | 0.079              |
| 0.037 | -0.037 | 180.000          | 0.200       | 0.237              |
| 0.024 | 0.024  | 225.833          | 0.050       | 0.026              |
| 0.021 | 0.021  | 210.000          | 0.100       | 0.079              |
| 0.020 | 0.020  | 195.000          | 0.125       | 0.105              |
| 0.018 | 0.018  | 188.333          | 0.150       | 0.132              |
| 0.016 | 0.016  | 185.000          | 0.200       | 0.184              |
| 0.001 | -0.001 | 243.333          | 0.025       | 0.026              |
| 0.000 | 0.000  | -1.000           | 1.000       | 1.000              |
| 0.000 | 0.000  | 251.000          | 0.000       | 0.000              |

  

| J     | J      | positive<br>if ≥ | sensitivity | 1 -<br>specificity |
|-------|--------|------------------|-------------|--------------------|
| 0.300 | 0.300  | 262.500          | 0.300       | 0.000              |
| 0.274 | 0.274  | 257.500          | 0.300       | 0.026              |
| 0.250 | 0.250  | 267.500          | 0.250       | 0.000              |
| 0.247 | 0.247  | 252.500          | 0.300       | 0.053              |
| 0.225 | 0.225  | 272.500          | 0.225       | 0.000              |
| 0.221 | 0.221  | 247.500          | 0.300       | 0.079              |
| 0.217 | 0.217  | 207.500          | 0.375       | 0.158              |
| 0.216 | 0.216  | 195.000          | 0.400       | 0.184              |
| 0.193 | 0.193  | 224.167          | 0.325       | 0.132              |
| 0.192 | 0.192  | 216.667          | 0.350       | 0.158              |
| 0.189 | 0.189  | 187.500          | 0.400       | 0.211              |
| 0.168 | 0.168  | 237.500          | 0.300       | 0.132              |
| 0.163 | 0.163  | 182.500          | 0.400       | 0.237              |
| 0.147 | -0.147 | 14.167           | 0.800       | 0.947              |
| 0.137 | 0.137  | 176.667          | 0.400       | 0.263              |
| 0.125 | 0.125  | 277.500          | 0.125       | 0.000              |
| 0.124 | -0.124 | 7.500            | 0.850       | 0.974              |
| 0.122 | -0.122 | 12.500           | 0.825       | 0.947              |
| 0.097 | -0.097 | 10.000           | 0.850       | 0.947              |
| 0.095 | -0.095 | 17.500           | 0.800       | 0.895              |
| 0.092 | -0.092 | 34.167           | 0.750       | 0.842              |
| 0.084 | -0.084 | 80.833           | 0.600       | 0.684              |
| 0.084 | 0.084  | 171.667          | 0.400       | 0.316              |
| 0.083 | -0.083 | 88.333           | 0.575       | 0.658              |
| 0.075 | -0.075 | 3.667            | 0.925       | 1.000              |
| 0.074 | -0.074 | 6.000            | 0.900       | 0.974              |
| 0.068 | -0.068 | 21.667           | 0.800       | 0.868              |
| 0.067 | -0.067 | 30.833           | 0.775       | 0.842              |
| 0.066 | -0.066 | 40.000           | 0.750       | 0.816              |
| 0.064 | -0.064 | 45.833           | 0.725       | 0.789              |
| 0.059 | -0.059 | 74.167           | 0.625       | 0.684              |
| 0.058 | 0.058  | 165.000          | 0.400       | 0.342              |
| 0.057 | -0.057 | 91.667           | 0.575       | 0.632              |
| 0.057 | 0.057  | 158.333          | 0.425       | 0.368              |
| 0.050 | -0.050 | 2.667            | 0.950       | 1.000              |
| 0.050 | 0.050  | 282.500          | 0.050       | 0.000              |
| 0.049 | -0.049 | 4.667            | 0.925       | 0.974              |
| 0.042 | -0.042 | 25.833           | 0.800       | 0.842              |
| 0.038 | -0.038 | 48.333           | 0.725       | 0.763              |
| 0.034 | -0.034 | 70.000           | 0.650       | 0.684              |
| 0.030 | -0.030 | 96.667           | 0.575       | 0.605              |
| 0.029 | 0.029  | 155.000          | 0.450       | 0.421              |
| 0.025 | -0.025 | 1.000            | 0.975       | 1.000              |
| 0.025 | -0.025 | 133.333          | 0.475       | 0.500              |
| 0.024 | -0.024 | 145.000          | 0.450       | 0.474              |
| 0.014 | 0.014  | 61.667           | 0.725       | 0.711              |
| 0.012 | -0.012 | 53.333           | 0.725       | 0.737              |
| 0.003 | 0.003  | 151.667          | 0.450       | 0.447              |
| 0.003 | -0.003 | 105.000          | 0.550       | 0.553              |
| 0.001 | -0.001 | 118.333          | 0.525       | 0.526              |
| 0.001 | 0.001  | 138.333          | 0.475       | 0.474              |
| 0.000 | 0.000  | -1.000           | 1.000       | 1.000              |
| 0.000 | 0.000  | 128.333          | 0.500       | 0.500              |
| 0.000 | 0.000  | 286.000          | 0.000       | 0.000              |

**Figure S8.** ROC analysis. For HDAC 1 (A) and HDAC 2 (B), the receiver operating characteristics (ROC) were used for determination of a (discrimination) HDAC expression threshold separating clinical cases according to their survival status including the Youden Index (J) indicating the threshold with the highest discrimination power.

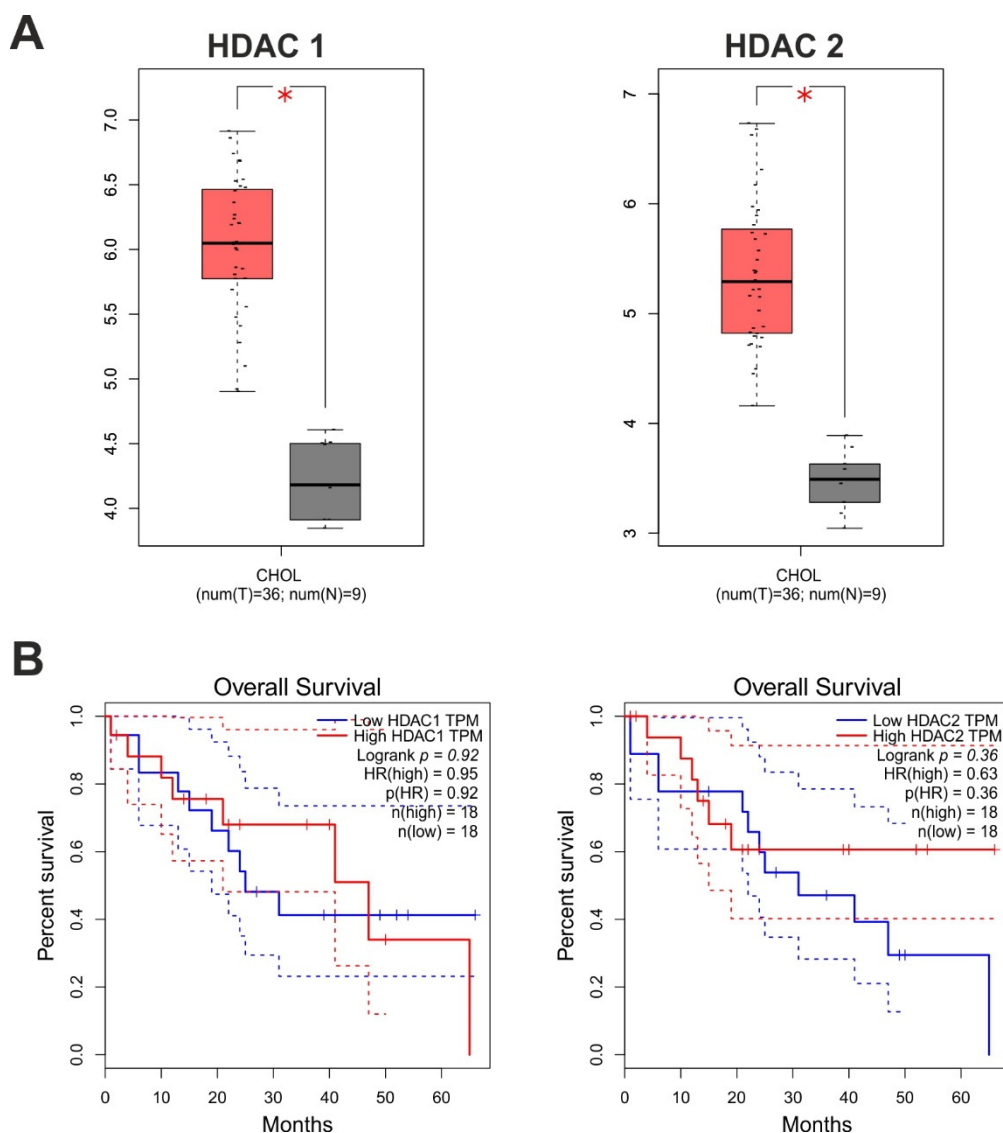

**Figure S9.** In silico analysis for HDAC 1 and HDAC 2 expression / survival data using GEPIA (<http://gepia.cancer-pku.cn> accessed date 06/2021; see Tang, Z. et al. (2017) GEPIA: a web server for cancer and normal gene expression profiling and interactive analyses. *Nucleic Acids Res.* 10.1093/nar/gkx247). (A) HDAC 1 and HDAC 2 are overexpressed in BTC tissue compared to adjacent non-tumor tissue. (B) Survival analysis (default cut-off value = median HDAC 1/2 score).

(A)

| Step | HDAC1-Cutoff | Logistic regression, p-value | "positive" cases (n) |
|------|--------------|------------------------------|----------------------|
| 0    | 0            | 0.226                        | 34                   |
| 1    | 5            | 0.016                        | 28                   |
| 2    | 10           | 0.014                        | 25                   |
| 3    | 15           | 0.012                        | 22                   |
| 4    | 20           | 0.027                        | 22                   |
| 5    | 25           | 0.019                        | 21                   |
| 6    | 30           | 0.013                        | 20                   |
| 7    | 35           | 0.013                        | 20                   |
| 8    | 40           | 0.025                        | 18                   |
| 9    | 45           | 0.025                        | 18                   |
| 10   | 50           | 0.038                        | 17                   |
| 11   | 55           | 0.038                        | 17                   |
| 12   | 60           | 0.038                        | 17                   |
| 13   | 65           | 0.019                        | 15                   |
| 14   | 70           | 0.019                        | 15                   |
| 15   | 75           | 0.034                        | 15                   |
| 16   | 80           | 0.078                        | 15                   |
| 17   | 85           | 0.117                        | 15                   |
| 18   | 90           | 0.117                        | 15                   |
| 19   | 95           | 0.117                        | 15                   |
| 20   | 100          | 0.117                        | 15                   |
| 21   | 105          | 0.169                        | 15                   |
| 22   | 110          | 0.117                        | 14                   |
| 23   | 115          | 0.117                        | 14                   |
| 24   | 120          | 0.12                         | 13                   |
| 25   | 125          | 0.12                         | 13                   |
| 26   | 130          | 0.304                        | 13                   |
| 27   | 135          | 0.304                        | 13                   |
| 28   | 140          | 0.444                        | 13                   |
| 29   | 145          | 0.395                        | 12                   |
| 30   | 150          | 0.329                        | 11                   |
| 31   | 155          | 0.48                         | 10                   |
| 32   | 160          | 0.518                        | 10                   |
| 33   | 165          | 0.518                        | 10                   |
| 34   | 170          | 0.348                        | 8                    |
| 35   | 175          | 0.348                        | 8                    |
| 36   | 180          | 0.692                        | 8                    |
| 37   | 185          | 0.988                        | 8                    |
| 38   | 190          | 0.696                        | 5                    |
| 39   | 195          | 0.696                        | 5                    |
| 40   | 200          | 0.492                        | 5                    |
| 41   | 205          | 0.492                        | 5                    |
| 42   | 210          | 0.658                        | 4                    |
| 43   | 215          | 0.67                         | 2                    |
| 44   | 220          | 0.67                         | 2                    |
| 45   | 225          | 0.67                         | 2                    |
| 46   | 230          | 0.67                         | 2                    |
| 47   | 235          | 0.67                         | 2                    |
| 48   | 240          | 0.738                        | 1                    |
| 49   | 245          | 0.738                        | 1                    |
| 50   | 250          |                              | 0                    |
| 51   | 255          |                              | 0                    |
| 52   | 260          |                              | 0                    |
| 53   | 265          |                              | 0                    |
| 54   | 270          |                              | 0                    |
| 55   | 275          |                              | 0                    |
| 56   | 280          |                              | 0                    |
| 57   | 285          |                              | 0                    |
| 58   | 290          |                              | 0                    |
| 59   | 295          |                              | 0                    |
| 60   | 300          |                              | 0                    |

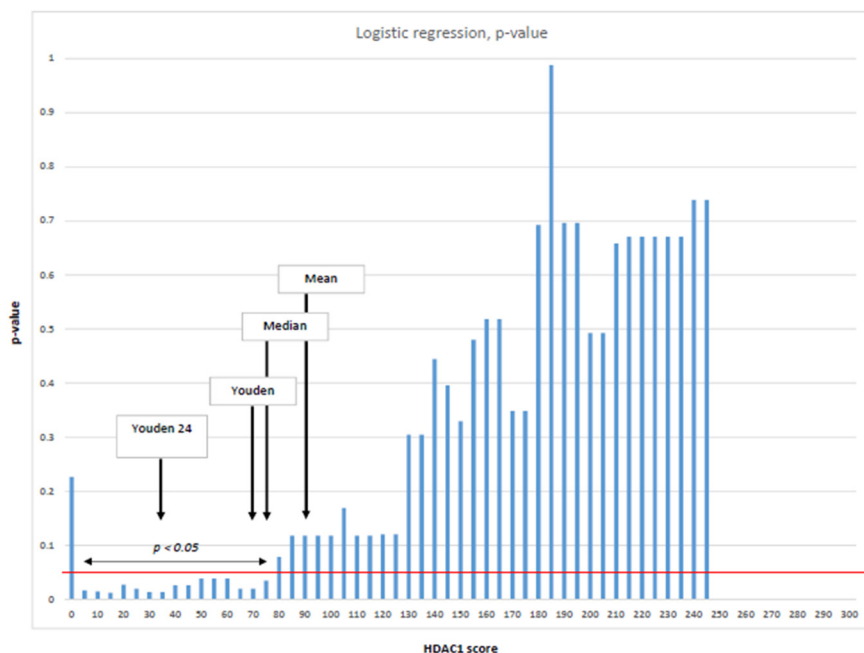

(B)

| Step | HDAC2-Cutoff | Logistic regression, p-value | "positive" cases (n) |
|------|--------------|------------------------------|----------------------|
| 0    | 0            | 0.31                         | 39                   |
| 1    | 5            | 0.453                        | 37                   |
| 2    | 10           | 0.452                        | 34                   |
| 3    | 15           | 0.702                        | 32                   |
| 4    | 20           | 0.827                        | 32                   |
| 5    | 25           | 0.951                        | 32                   |
| 6    | 30           | 0.684                        | 31                   |
| 7    | 35           | 0.79                         | 30                   |
| 8    | 40           | 0.79                         | 30                   |
| 9    | 45           | 0.72                         | 29                   |
| 10   | 50           | 0.991                        | 29                   |
| 11   | 55           | 0.991                        | 29                   |
| 12   | 60           | 0.824                        | 29                   |
| 13   | 65           | 0.824                        | 29                   |
| 14   | 70           | 0.781                        | 26                   |
| 15   | 75           | 0.418                        | 24                   |
| 16   | 80           | 0.418                        | 24                   |
| 17   | 85           | 0.418                        | 24                   |
| 18   | 90           | 0.409                        | 23                   |
| 19   | 95           | 0.588                        | 23                   |
| 20   | 100          | 0.768                        | 22                   |
| 21   | 105          | 0.768                        | 22                   |
| 22   | 110          | 0.717                        | 21                   |
| 23   | 115          | 0.717                        | 21                   |
| 24   | 120          | 0.717                        | 21                   |
| 25   | 125          | 0.717                        | 21                   |
| 26   | 130          | 0.49                         | 19                   |
| 27   | 135          | 0.49                         | 19                   |
| 28   | 140          | 0.582                        | 18                   |
| 29   | 145          | 0.582                        | 18                   |
| 30   | 150          | 0.696                        | 18                   |
| 31   | 155          | 0.956                        | 18                   |
| 32   | 160          | 0.507                        | 16                   |
| 33   | 165          | 0.507                        | 16                   |
| 34   | 170          | 0.34                         | 16                   |
| 35   | 175          | 0.194                        | 16                   |
| 36   | 180          | 0.173                        | 16                   |
| 37   | 185          | 0.129                        | 16                   |
| 38   | 190          | 0.073                        | 16                   |
| 39   | 195          | 0.073                        | 16                   |
| 40   | 200          | 0.097                        | 15                   |
| 41   | 205          | 0.097                        | 15                   |
| 42   | 210          | 0.097                        | 15                   |
| 43   | 215          | 0.16                         | 14                   |
| 44   | 220          | 0.11                         | 13                   |
| 45   | 225          | 0.11                         | 13                   |
| 46   | 230          | 0.154                        | 12                   |
| 47   | 235          | 0.154                        | 12                   |
| 48   | 240          | 0.154                        | 12                   |
| 49   | 245          | 0.003                        | 12                   |
| 50   | 250          | 0.002                        | 12                   |
| 51   | 255          | 0                            | 12                   |
| 52   | 260          | 0                            | 12                   |
| 53   | 265          | 0                            | 10                   |
| 54   | 270          | 0.001                        | 9                    |
| 55   | 275          | 0.03                         | 5                    |
| 56   | 280          | 0.309                        | 2                    |
| 57   | 285          |                              | 0                    |
| 58   | 290          |                              | 0                    |
| 59   | 295          |                              | 0                    |
| 60   | 300          |                              | 0                    |

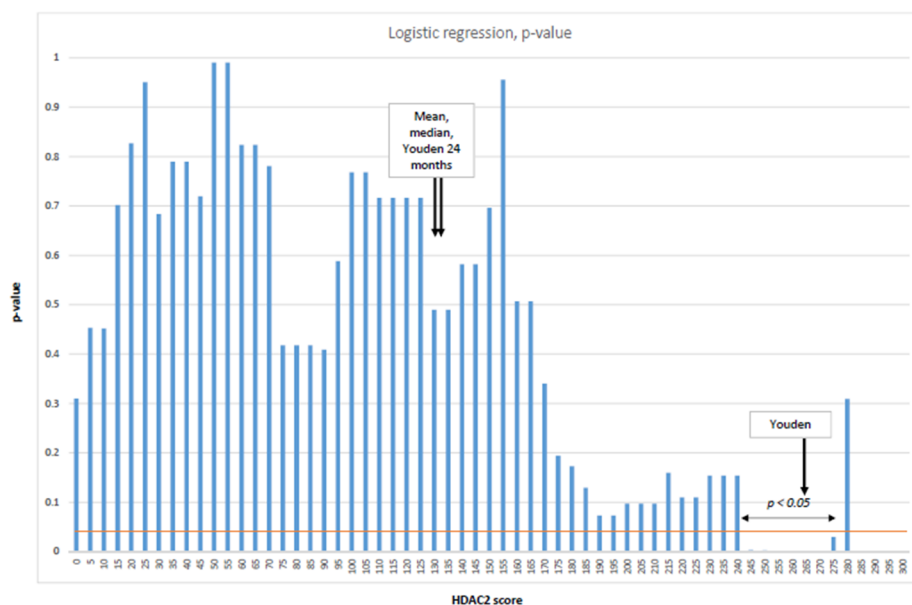

**Figure S10.** Calculation of logistic regression-derived p-values for HDAC 1 (A) and HDAC 2 (B). The graphs indicate the high discrimination power of the calculated Youden-index as well as the discrimination potential of the time-dependent mean and median values ( $t = 24$  months) for HDAC 1 (A) and HDAC 2 (B), respectively.

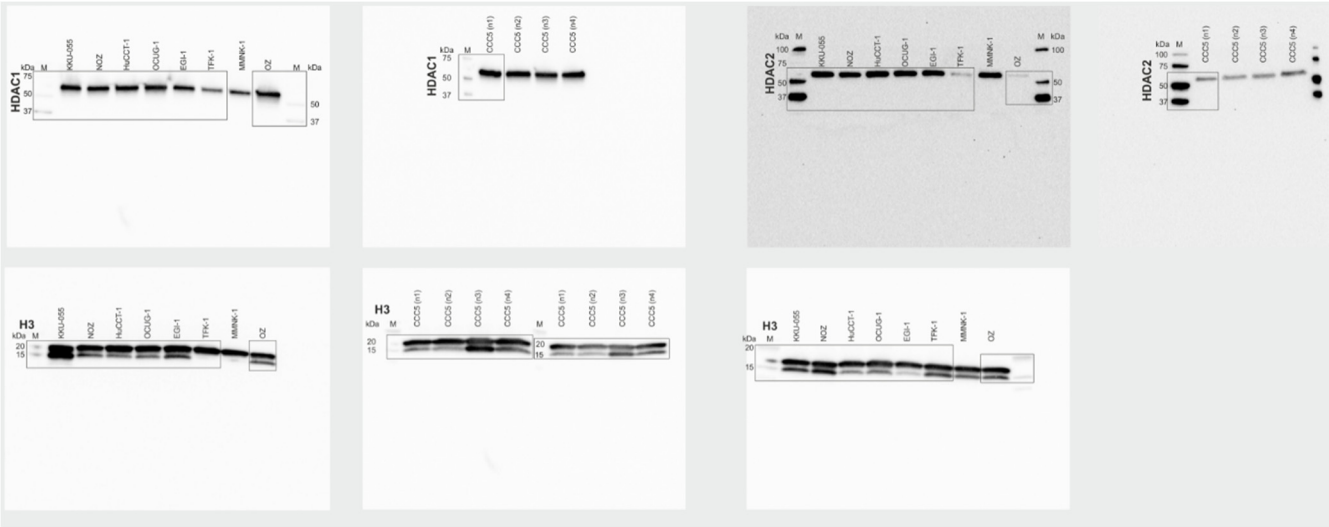

Figure S11. Original (uncropped) blots for Figure 3.

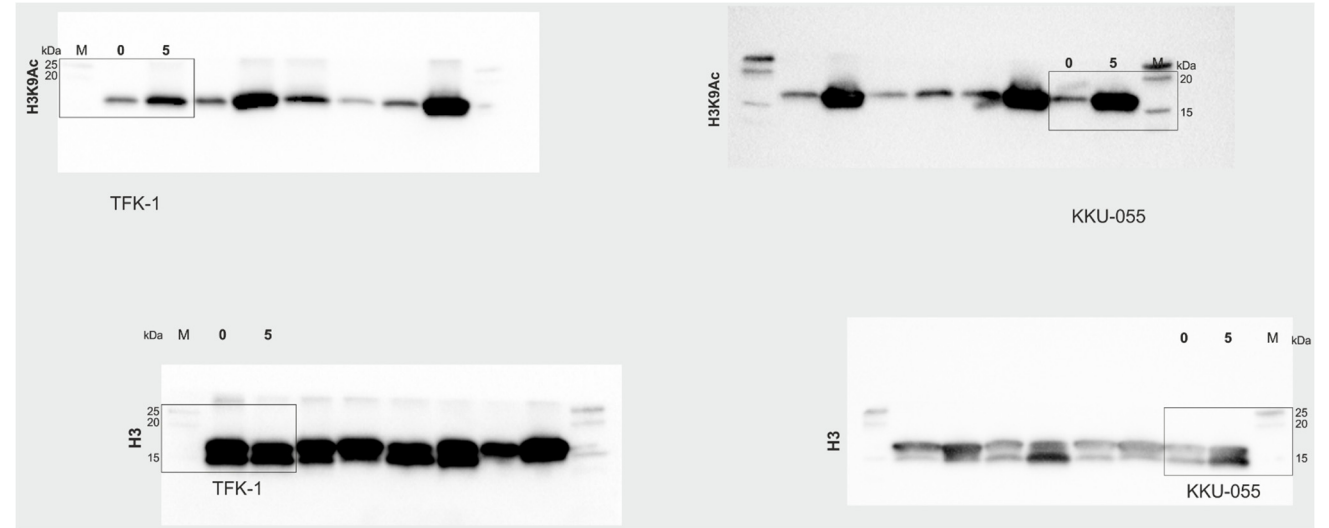

Figure S12. Original (uncropped) blots for Figure 5.
